# Supplementary material for: Efficacy and Security of Tetrodotoxin in the Treatment of Cancer-Related Pain: Systematic Review and Meta-Analysis
Source: MDPI journal article supplement (doi:10.3390/md21050316), 2023-05-21
Supplement: s1 [file s1]

### Supplementary Data 1: Risk of Bias assessed with ROBINS-I

| Study              | Domain 1 | Domain 2 | Domain 3 | Domain 4 | Domain 5 | Domain 6 | Domain 7 | Overall  |
|--------------------|----------|----------|----------|----------|----------|----------|----------|----------|
| Hagen et al., 2007 | Low      | Moderate | Moderate | Low      | Low      | Moderate | Moderate | Moderate |
| Hagen et al., 2011 | Low      | Serious  | Moderate | Low      | Moderate | Moderate | Moderate | Serious  |

Table S1: Report of the consensus of the risk of bias with Risk Of Bias In Non-Randomized Studies of Interventions (ROBINS-I) tool evaluated by two authors. Domain 1: Bias due to confounding, Domain 2: Bias in selection of participants into the study, Domain 3: Bias in classification of interventions, Domain 4: Bias due to deviations from intended interventions, Domain 5: Bias due to missing data, Domain 6: Bias in measurement of outcomes, Domain 7: Bias in selection of the reported result.

### Supplementary Data 2: Code used in R for the meta-analysis

#### META-ANALYSIS 1, EFFICACY:

```
dat1 <- escalc(measure="OR", ai=dat.bcg$`TTX responders`, bi=dat.bcg$`TTX non-responders`,
ci=dat.bcg$`Placebo responders`, di=dat.bcg$`Placebo non-responders`, data=dat.bcg)
dat1
```

|    | Author           | Year | TTX.responders | TTX.non.responders | Placebo.responders | Placebo.non.responders |
|----|------------------|------|----------------|--------------------|--------------------|------------------------|
| yi |                  |      |                |                    |                    | vi                     |
| 1  | Hagen et al.,    | 2017 | 33             | 32                 | 29                 | 55 0.6708 0.1142       |
| 2  | Goldlust et al., | 2021 | 15             | 11                 | 8                  | 17 1.0639 0.3414       |
| 3  | Hagen et al.,    | 2008 | 16             | 25                 | 12                 | 29 0.4361 0.2203       |

```
res1 <- rma(yi, vi, data=dat1)
Res1
confint(res1)
```

```
estimate ci.lb ci.ub
tau^2 0.0000 0.0000 3.6863
tau 0.0000 0.0000 1.9200
I^2(%) 0.0000 0.0000 94.7028
H^2 1.0000 1.0000 18.8777
```

```
> res1
Random-Effects Model (k = 3; tau^2 estimator: REML)
```

```
tau^2 (estimated amount of total heterogeneity): 0 (SE = 0.1980)
tau (square root of estimated tau^2 value): 0
I^2 (total heterogeneity / total variability): 0.00%
H^2 (total variability / sampling variability): 1.00
```

Test for Heterogeneity:

Q(df = 2) = 0.7023, p-val = 0.7039

Model Results:

```
estimate    se    zval    pval    ci.lb    ci.ub
0.6761 0.2483 2.7233 0.0065 0.1895 1.1627 **
```

---

Signif. codes: 0 '\*\*\*' 0.001 '\*\*' 0.01 '\*' 0.05 '.' 0.1 ' ' 1

```
forest(res1, xlim=c(-1.8,4), annotate=TRUE, showweights=TRUE, col = "green", border = "black",
cex=1.6, order="obs", header="Author(s), Year", slab=paste(dat.bcg$Author, dat.bcg$Year, sep=", "))
```

## META-ANALYSIS 2, >1 AE RELATED TO THE DRUG:

| Author           | Year | TTX AE | TTX NON-AE | PLACEBO AE | PLACEBO<br>NON-AE |
|------------------|------|--------|------------|------------|-------------------|
| Hagen et al.,    | 2017 | 77     | 0          | 77         | 11                |
| Goldlust et al., | 2021 | 9      | 17         | 3          | 22                |
| Hagen et al.,    | 2008 | 34     | 7          | 28         | 12                |

```
datAE <- escalc(measure="OR", ai=X_1_AE_related_to_the_drug$`TTX AE`,
bi=X_1_AE_related_to_the_drug$`TTX NON-AE`, ci=X_1_AE_related_to_the_drug$`PLACEBO AE`,
di=X_1_AE_related_to_the_drug$`PLACEBO NON-AE`, data=X_1_AE_related_to_the_drug)
> dat1
```

|    | Author           | Year | TTX.responders | TTX.non.responders | Placebo.responders | Placebo.non.responders |
|----|------------------|------|----------------|--------------------|--------------------|------------------------|
| yi | vi               |      |                |                    |                    |                        |
| 1  | Hagen et al.,    | 2017 | 33             | 32                 | 29                 | 55 0.6708 0.1142       |
| 2  | Goldlust et al., | 2021 | 15             | 11                 | 8                  | 17 1.0639 0.3414       |
| 3  | Hagen et al.,    | 2008 | 16             | 25                 | 12                 | 29 0.4361 0.2203       |

```
> resAE=rma(datAE$yi, datAE$vi, data=datAE)
> resAE
```

Random-Effects Model (k = 3; tau^2 estimator: REML)

tau^2 (estimated amount of total heterogeneity): 0.0000 (SE = 0.5672)

tau (square root of estimated tau^2 value): 0.0026

I^2 (total heterogeneity / total variability): 0.00%

H^2 (total variability / sampling variability): 1.00

Test for Heterogeneity:

Q(df = 2) = 2.5377, p-val = 0.2812

```
forest(resAE, annotate=TRUE, showweights=TRUE, col = "red", border = "black", cex=1.6, order="obs",
header="Author(s), Year", slab=paste(X_1_AE_related_to_the_drug$Author,
X_1_AE_related_to_the_drug$Year, sep=", "))
```

### META-ANALYSIS 3, SERIOUS ADVERSE EVENTS RELATED TO THE DRUG

```
SAE_related_to_the_drug <- read_excel("C:/Users/ASUS/Downloads/SAE related to the drug.xlsx")
> View(SAE_related_to_the_drug)
> datSAE <- escalc(measure="OR", ai=SAE_related_to_the_drug$`TTX SAE`,
bi=SAE_related_to_the_drug$`TTX NON-SAE`, ci=SAE_related_to_the_drug$`PLACEBO SAE`,
di=SAE_related_to_the_drug$`PLACEBO NON-SAE`, data=SAE_related_to_the_drug)
> datSAE
```

|   | Author           | Year | TTX.SAE | TTX.NON.SAE | PLACEBO.SAE | PLACEBO.NON.SAE | yi      | vi     |
|---|------------------|------|---------|-------------|-------------|-----------------|---------|--------|
| 1 | Hagen et al.,    | 2017 | 6       | 71          | 3           | 85              | 0.8731  | 0.5258 |
| 2 | Goldlust et al., | 2021 | 1       | 25          | 1           | 24              | -0.0408 | 2.0817 |
| 3 | Hagen et al.,    | 2008 | 1       | 40          | 0           | 41              | 1.1230  | 2.7155 |

```
resSAE=rma(datAE$yi, datAE$vi, data=datAE)
```

```
> resSAE
```

Random-Effects Model (k = 3; tau^2 estimator: REML)

tau^2 (estimated amount of total heterogeneity): 0 (SE = 1.4420)

tau (square root of estimated tau^2 value): 0

I^2 (total heterogeneity / total variability): 0.00%

H^2 (total variability / sampling variability): 1.00

Test for Heterogeneity:

Q(df = 2) = 0.3805, p-val = 0.8268

Model Results:

| estimate | se     | zval   | pval   | ci.lb   | ci.ub  |
|----------|--------|--------|--------|---------|--------|
| 0.7469   | 0.6030 | 1.2387 | 0.2154 | -0.4349 | 1.9288 |

---

Signif. codes: 0 '\*\*\*' 0.001 '\*\*' 0.01 '\*' 0.05 '.' 0.1 ' ' 1
